# Supplementary material for: Highly loaded fine PtCo intermetallic compounds on 3D N-doped porous graphene for enhanced and sustained efficiency in PEMFCs
Source: Royal Society of Chemistry journal article supplement (doi:10.1039/d5ta05492c), 2026-01-01
Supplement: d5ta05492c1.pdf [file d5ta05492c1.pdf]

## Electronic Supplementary Information

### Highly loaded fine PtCo intermetallic compounds on 3D N-doped porous graphene for enhanced sustained efficiency in PEMFCs

Zhihao Wang<sup>a,b,†</sup>, Huihui Jin<sup>c,†</sup>, Yizhou Hao<sup>d</sup>, Cheng chen<sup>a,c\*</sup>, Haifeng Lv<sup>f\*</sup> and Daping He<sup>a,c\*</sup>

<sup>a</sup>Sanya Science and Education Innovation Park of Wuhan University of Technology, Sanya 572000, China

<sup>b</sup>School of Materials Science and Engineering, Wuhan University of Technology, Wuhan 430070, China

<sup>c</sup>Hubei Engineering Research Center of RF-Microwave Technology and Application, School of Science, Wuhan University of Technology, Wuhan 430070, China

<sup>d</sup>Guangzhou Moxi Technology Co Ltd, Guangzhou 510535, China

<sup>e</sup>State Key Laboratory of Advanced Technology for Materials Synthesis and Processing, Wuhan University of Technology, Wuhan 430070, China

<sup>f</sup>PEM Fuel Cell Catalyst Research and Development Center, Shenzhen Academy of Aerospace Technology, Shenzhen 518057, China

\*E-mail:        *chengchen@whut.edu.cn*,        *lvhaifenganl@gmail.com*,  
*hedaping@whut.edu.cn*

† These authors contributed equally to this work.

## Experimental Section

### Material Characterization

Powder X-ray diffraction (P-XRD) measurements were performed on a Bruker D8 Advance X-ray diffractometer using Cu K $\alpha$  radiation ( $\lambda = 1.5406 \text{ \AA}$ ). Scanning electron microscope (SEM) was carried on a JSM-7100F. Transmission electron microscope (TEM) and high-resolution transmission electron microscope (HR-TEM) were collected on a JEM-2100F. Thermogravimetric analysis (TGA) was performed on a STA449F3 thermoanalyzer. Raman spectra were recorded on a Renishaw (INVIA) using Ar ion laser as excitation light source with a 514.5 nm excitation wavelength. X-ray photoelectron spectroscopy (XPS) analysis was carried on an ESCALAB 250Xi spectrometer using an Al-K $\alpha$  radiation (1486 eV). Brunauer-Emmett-Teller (BET) specific surface areas were measured by N<sub>2</sub> physisorption on a Micromeritics ASAP 2020 system.

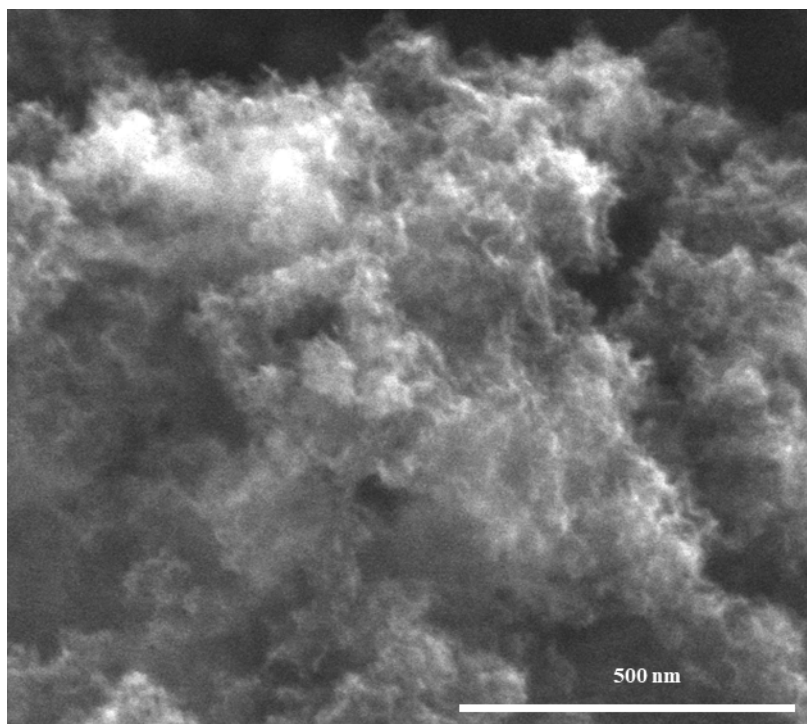

**Figure S1** SEM image of HGG

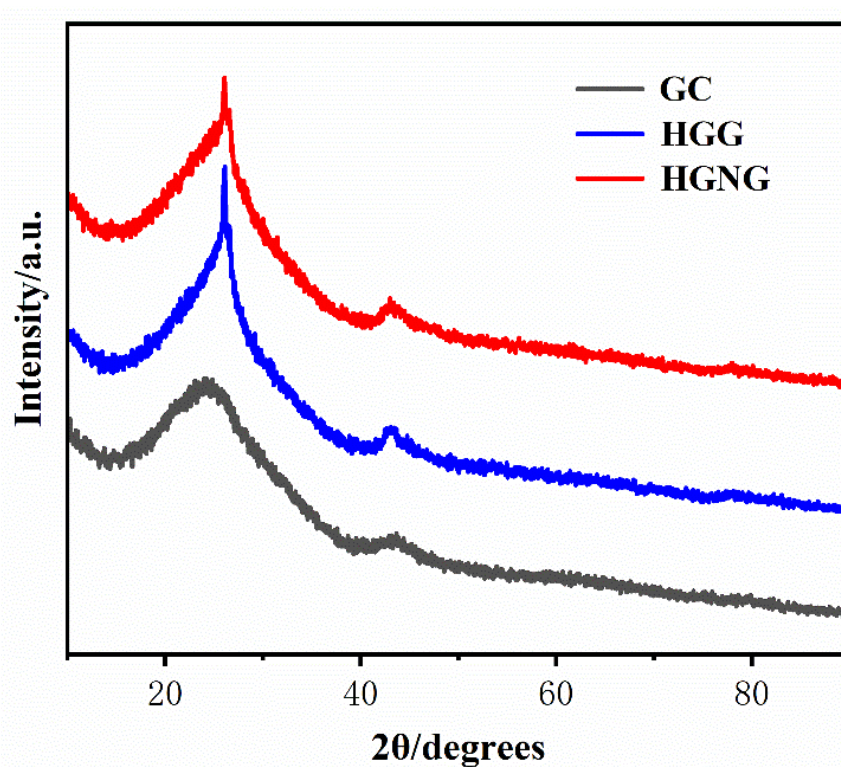

**Figure S2** XRD patterns of GC, HGG and HGNG

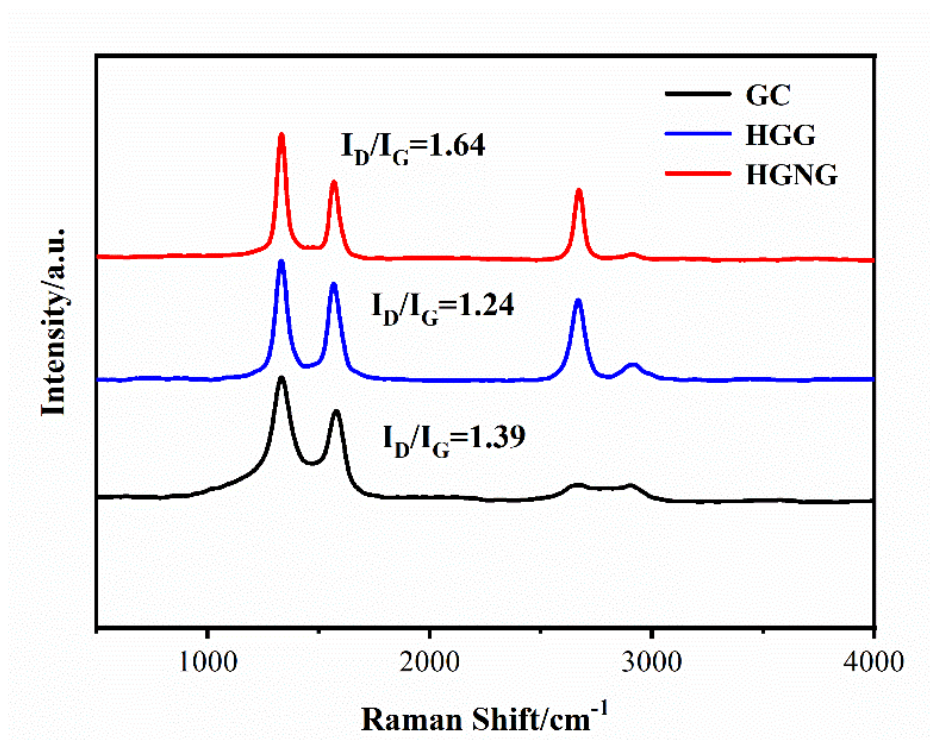

**Figure S3** Raman spectra of GC, HGG, HGNG

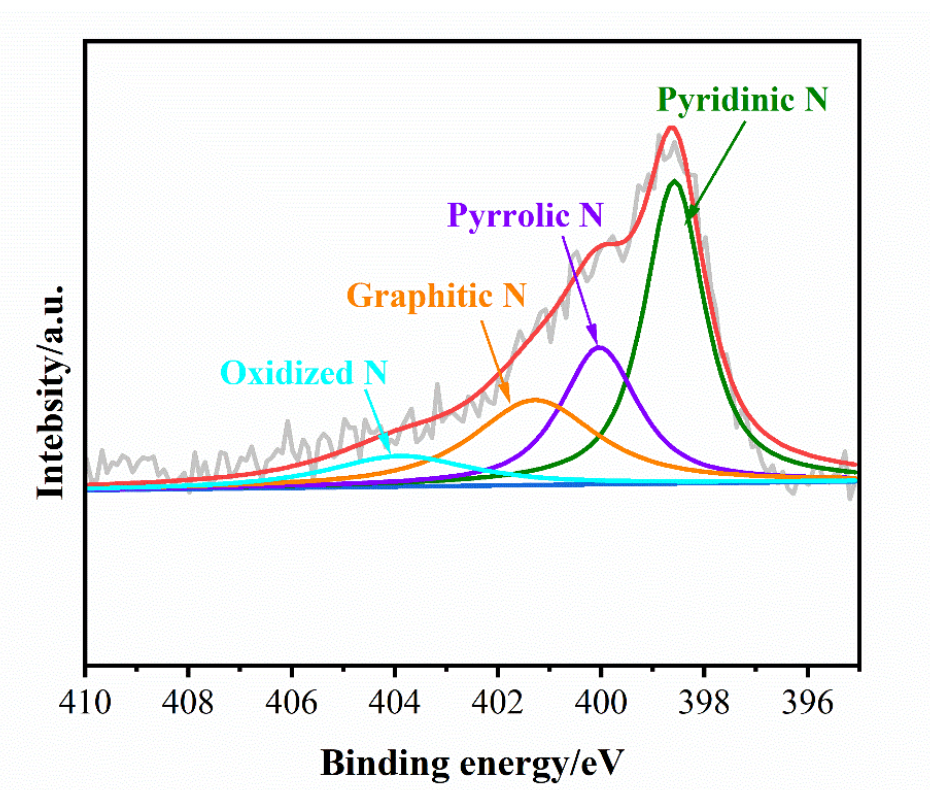

**Figure S4** High resolution XPS spectrum of N 1s

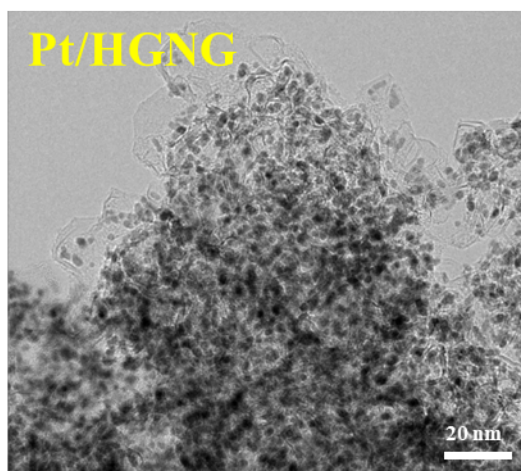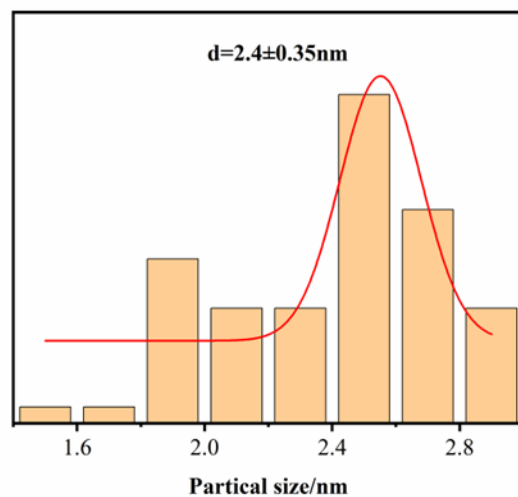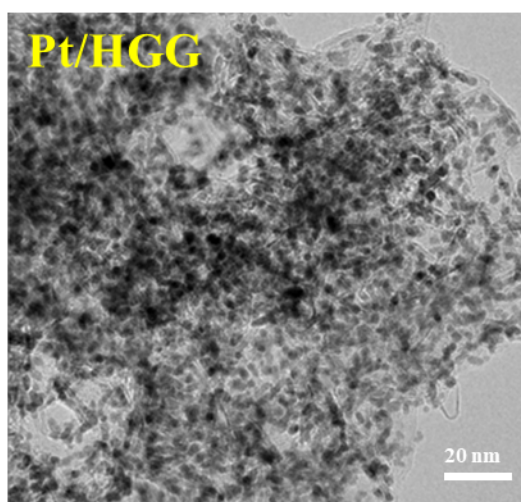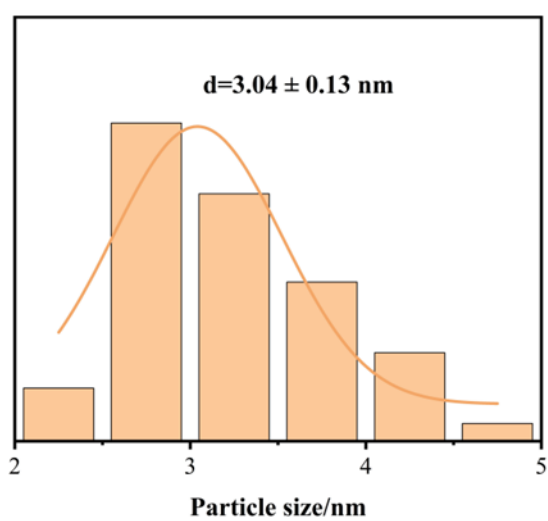

**Figure S5** TEM images and corresponding particle distribution of Pt/HGNG and Pt/HGG.

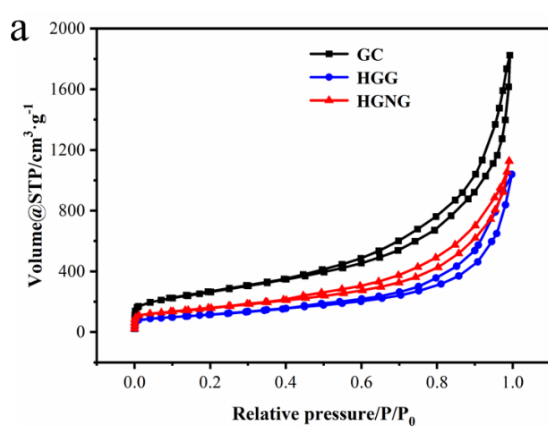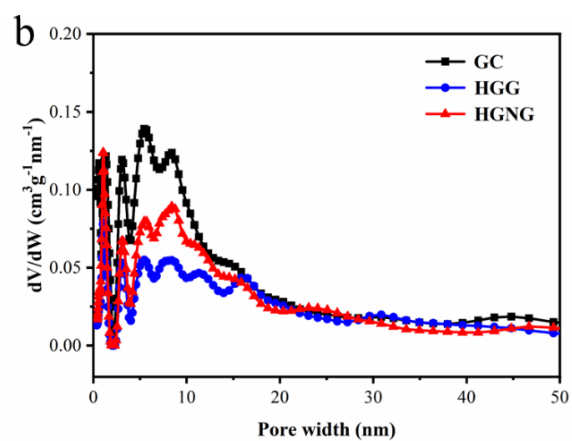



**Figure S6** N<sub>2</sub> adsorption/desorption isotherms and pore size distribution of GC, HGG and HGNG

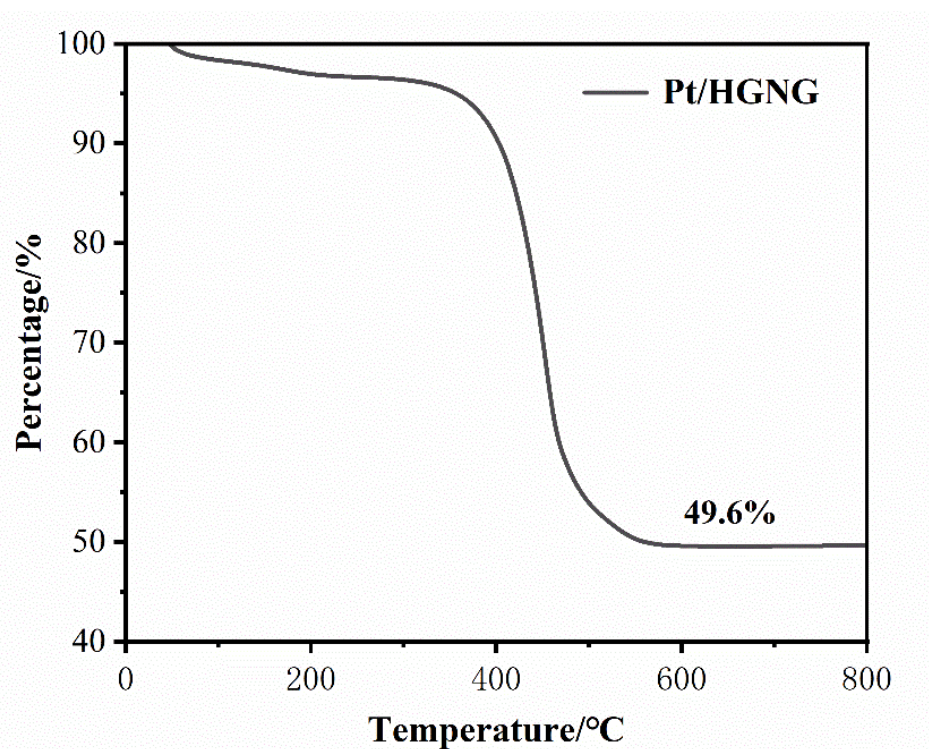

**Figure S7** TG curve of Pt/HGNG under air atmosphere

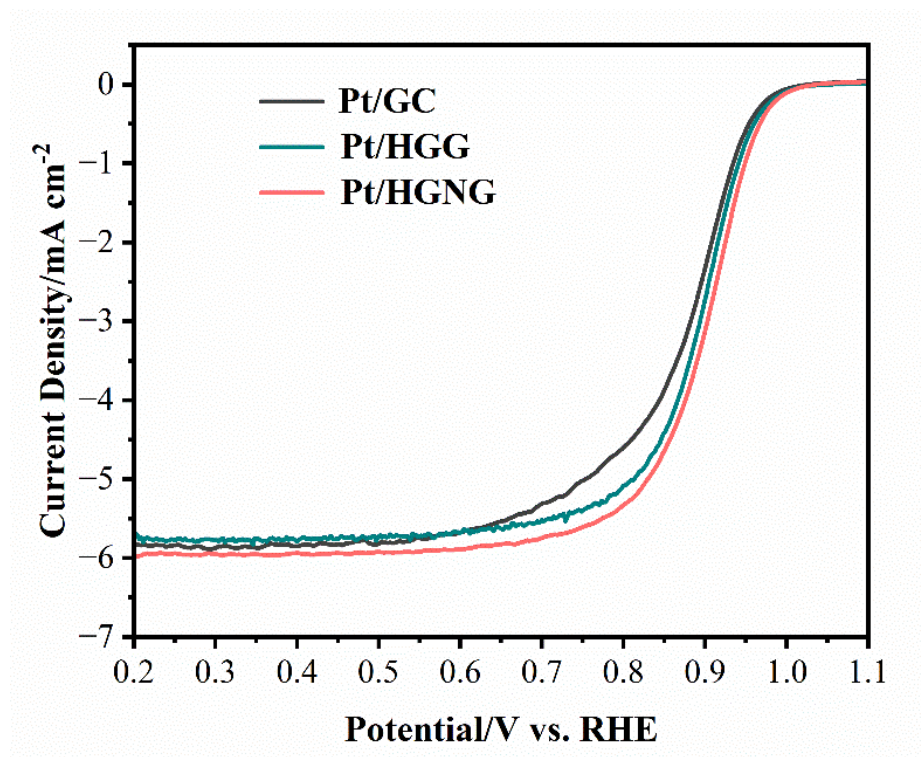

**Figure S8** LSV curves of Pt/GC, Pt/HGG and Pt/HGNG.

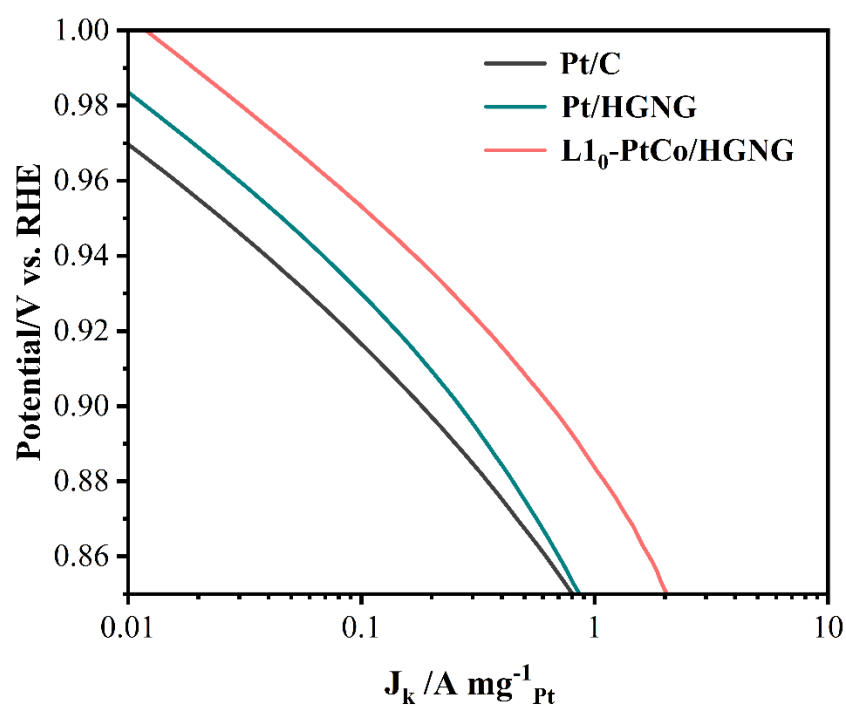

**Figure S9** Mass activity Tafel plot of L1<sub>0</sub>-PtCo/HGNG, Pt/HGNG and Pt/C

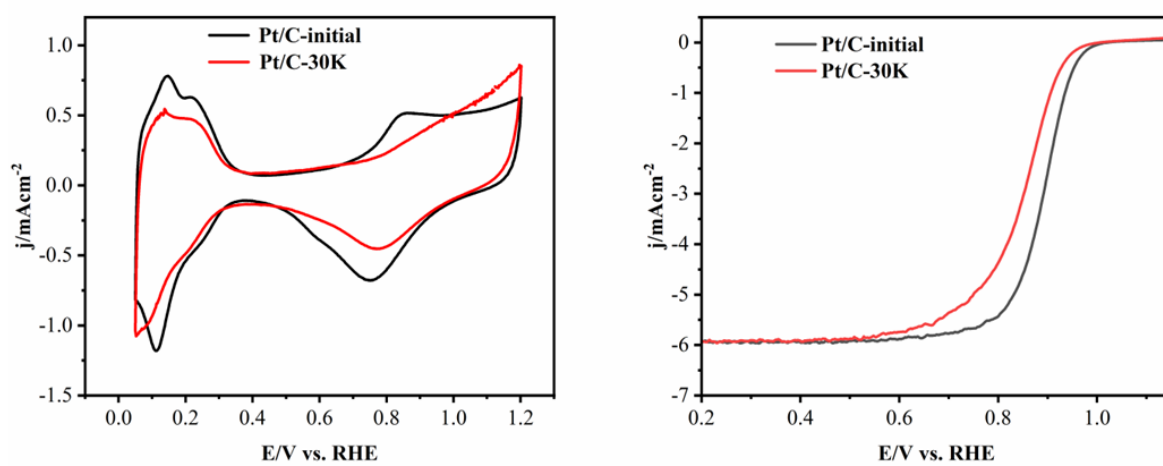

**Figure S10** CV and LSV curves of Pt/C before and after 30K ADT cycles in 0.1M HClO<sub>4</sub> solution.

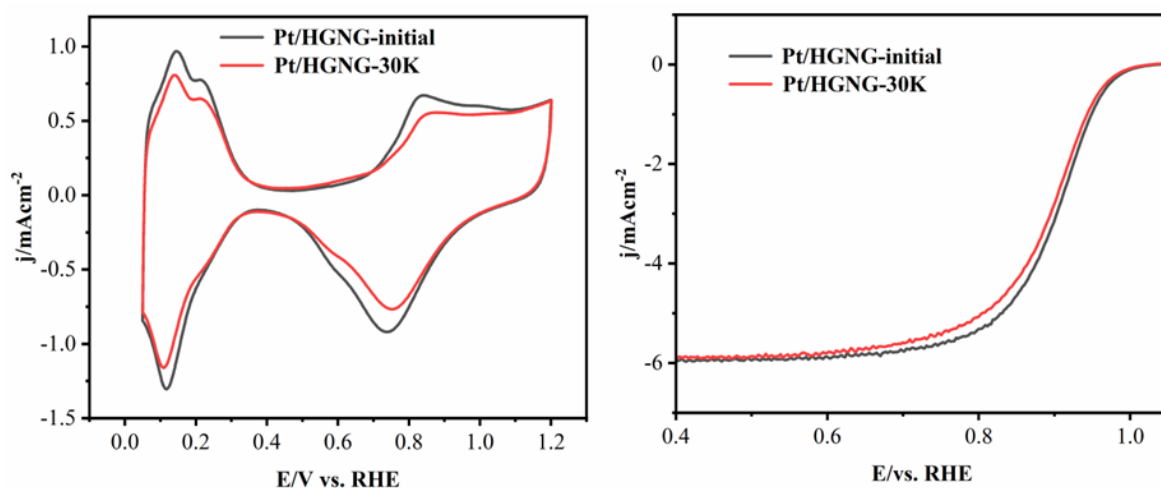

**Figure S11** CV and LSV curves of Pt/HGNG before and after 30K ADT cycles in 0.1M  $\text{HClO}_4$  solution.

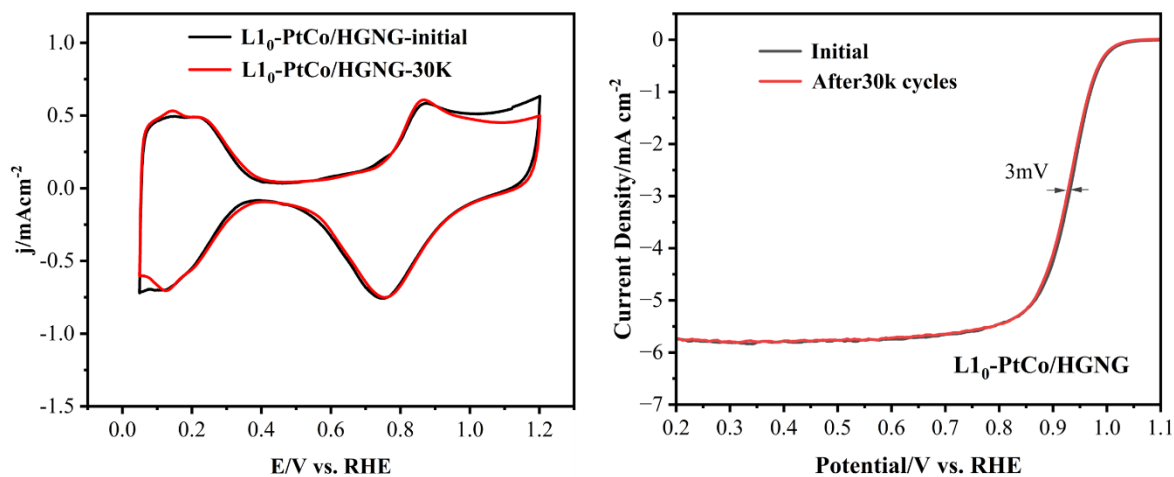

**Figure S12** CV and LSV curves of  $\text{L1}_0\text{-PtCo/HGNG}$  before and after 30K ADT cycles in 0.1M  $\text{HClO}_4$  solution.



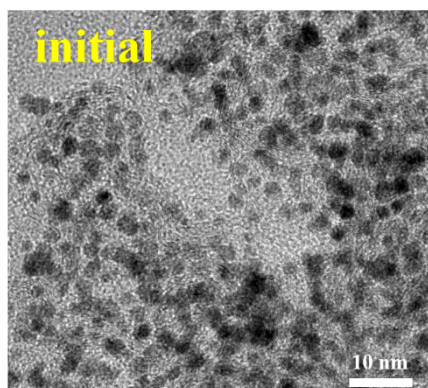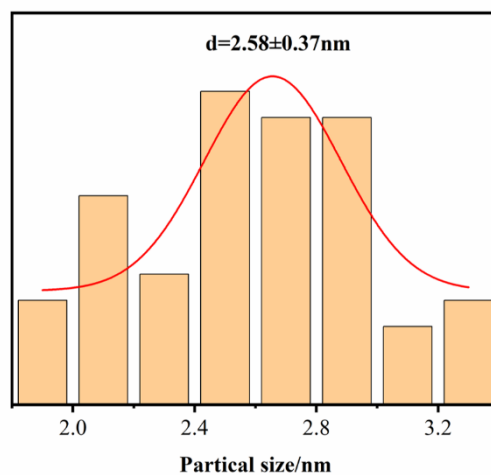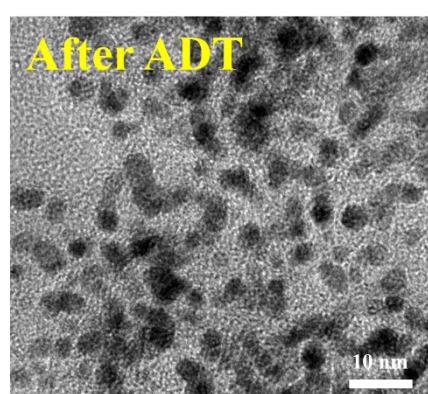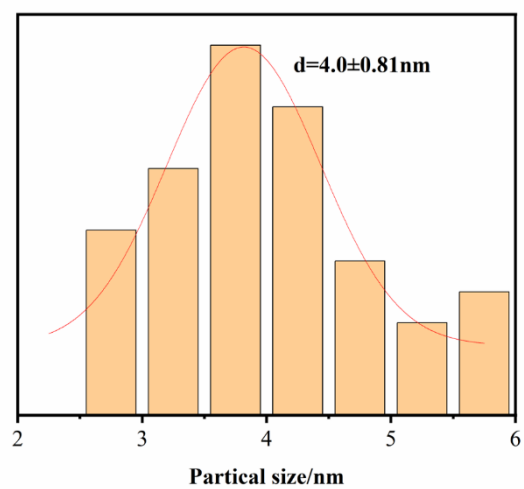

**Figure S13** TEM images and corresponding size distribution of commercial Pt/C before and after ADT.

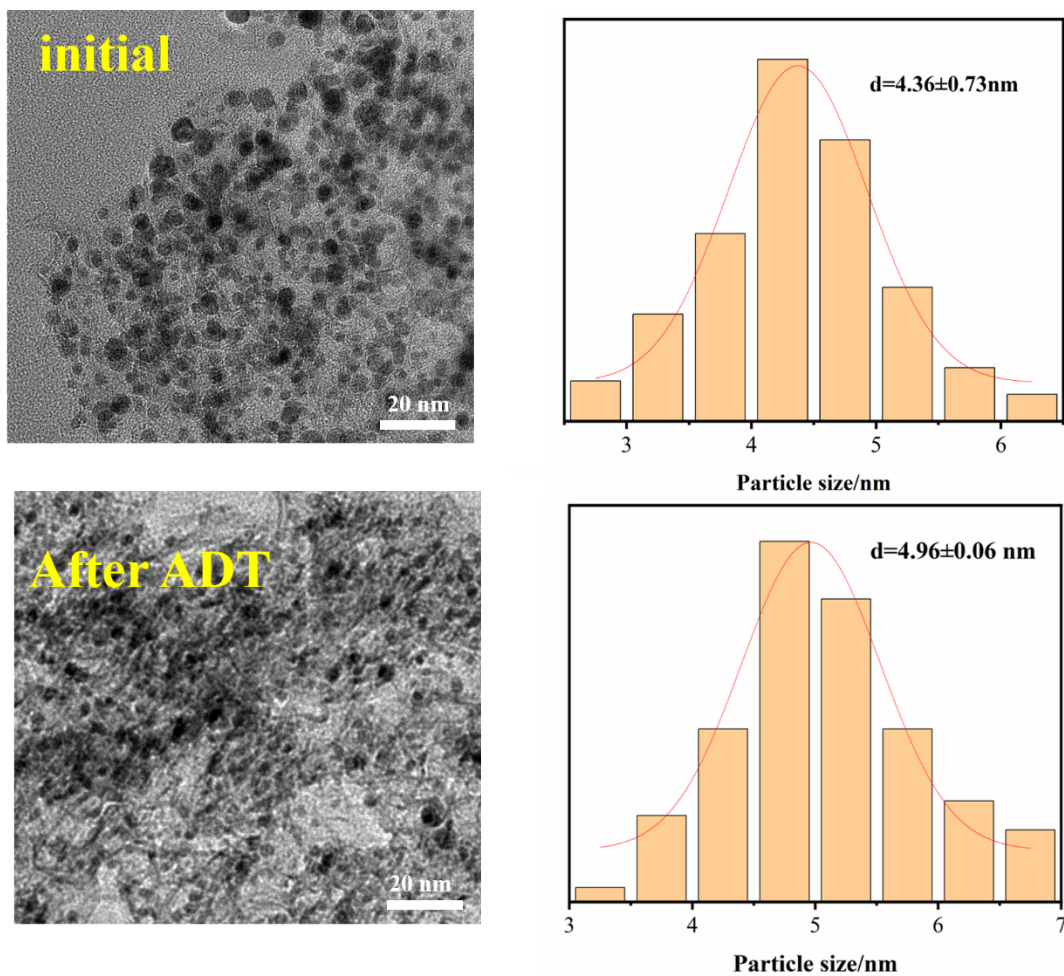

**Figure S14** TEM images and corresponding size distribution of L1<sub>0</sub>-PtCo/HGNG before and after ADT.

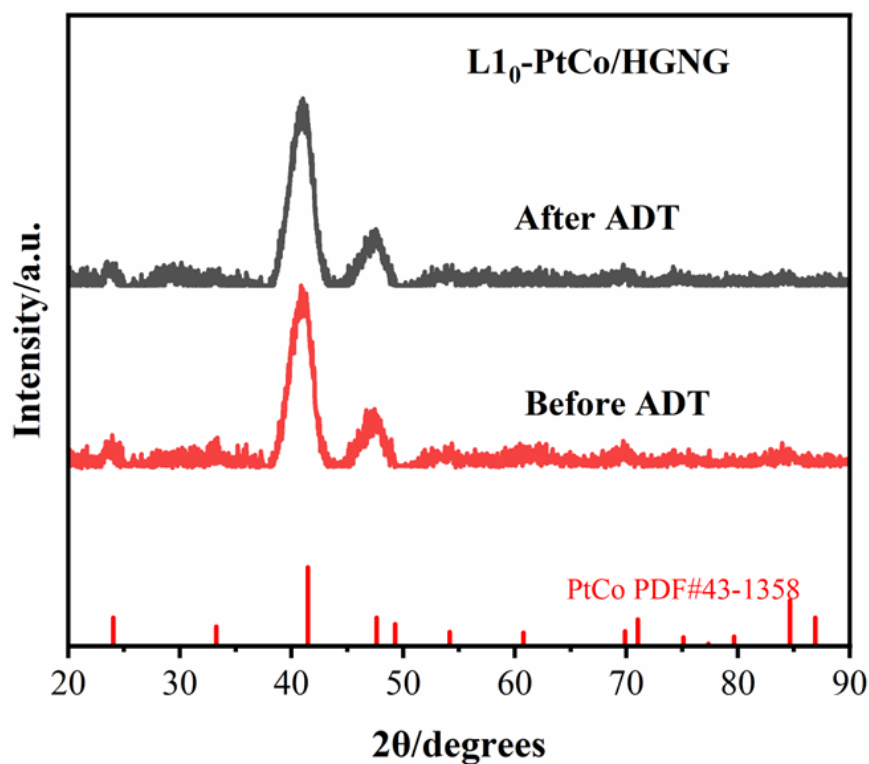

**Figure S15** XRD patterns of  $L1_0$ -PtCo/HGNG before and after 30K ADT cycles.

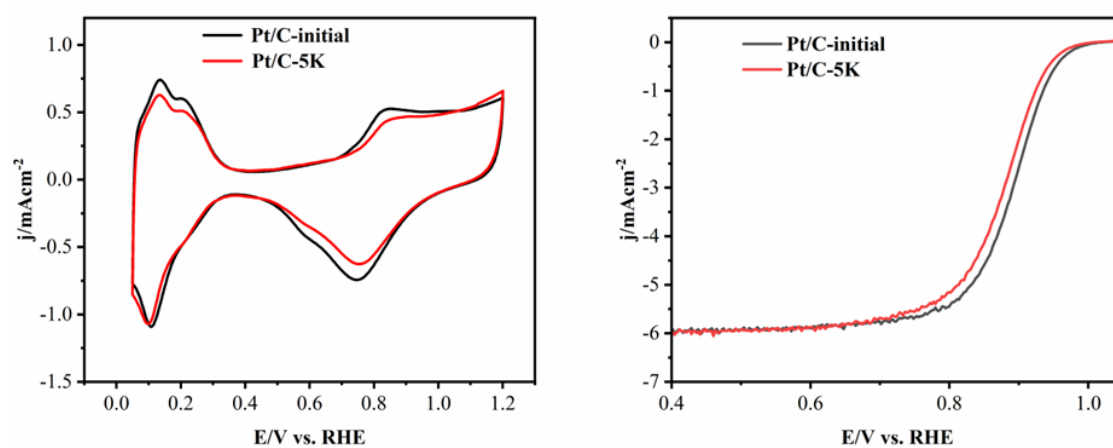

**Figure S16** CV curve of Pt/C before and after 5K ADT cycles in 0.1M  $HClO_4$  solution.

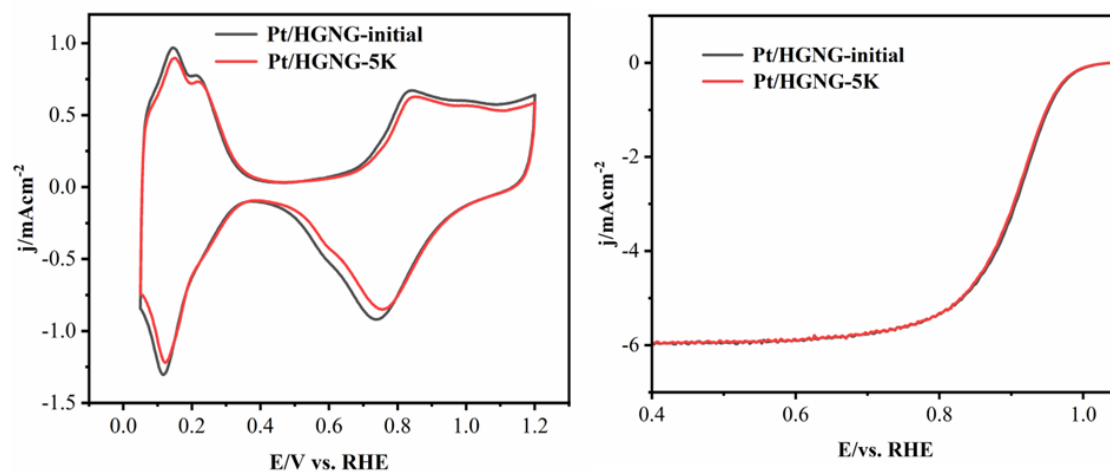

**Figure S17** CV curve of Pt/HGNG before and after 5K ADT cycles in 0.1M  $\text{HClO}_4$  solution.

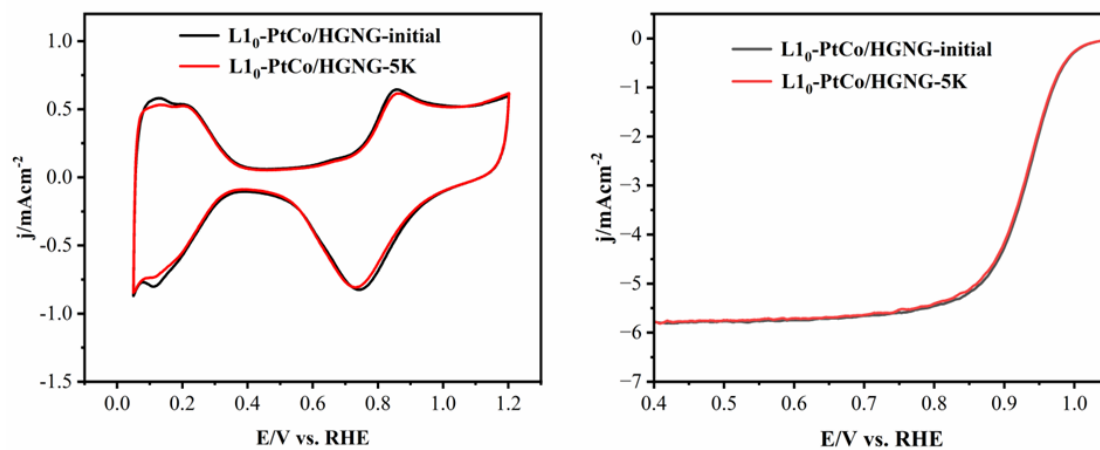

**Figure S18** CV curve of  $\text{L1}_0\text{-PtCo/HGNG}$  before and after 5K ADT cycles in 0.1M  $\text{HClO}_4$  solution.

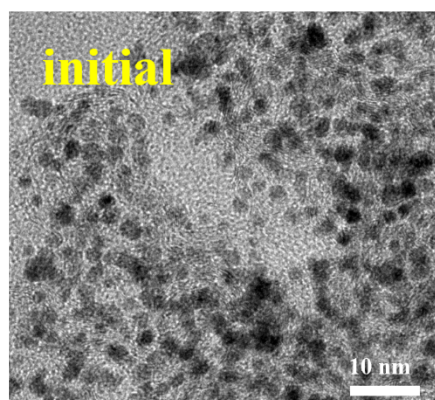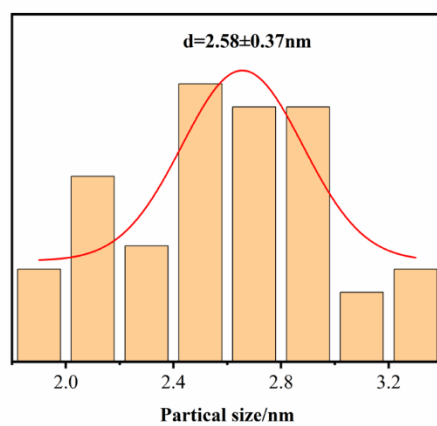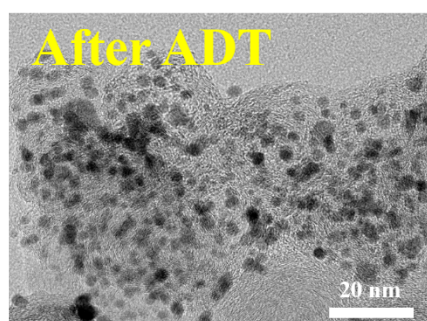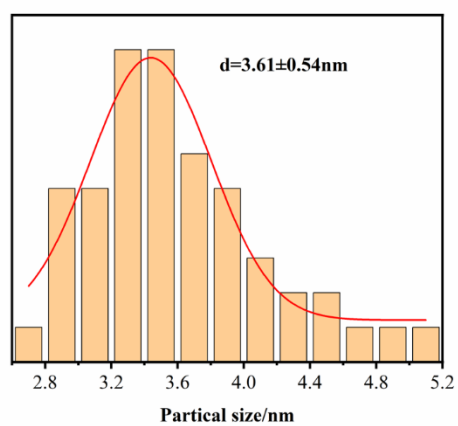

**Figure S19** TEM images and corresponding size distribution of commercial Pt/C before and after ADT.



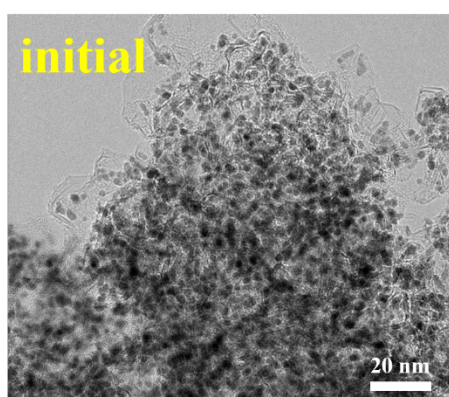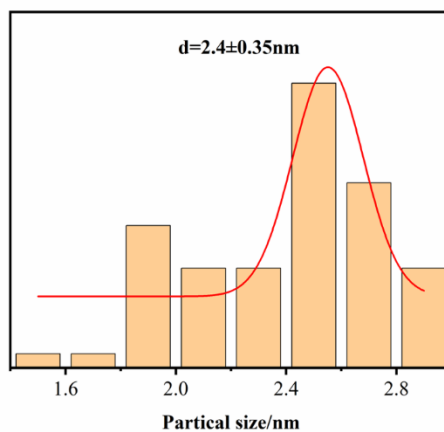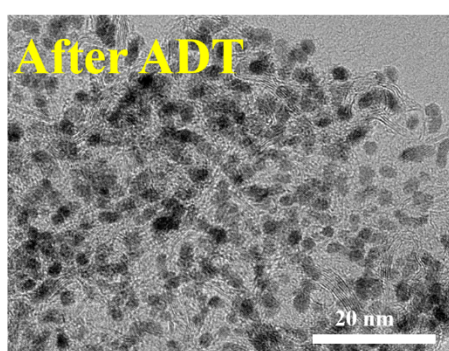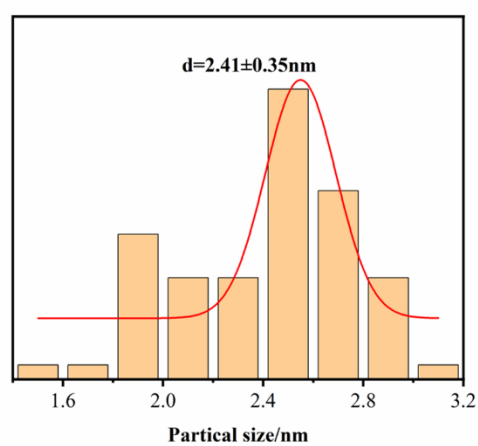

**Figure S20** TEM images and corresponding size distribution of commercial Pt/HGNG before and after ADT.

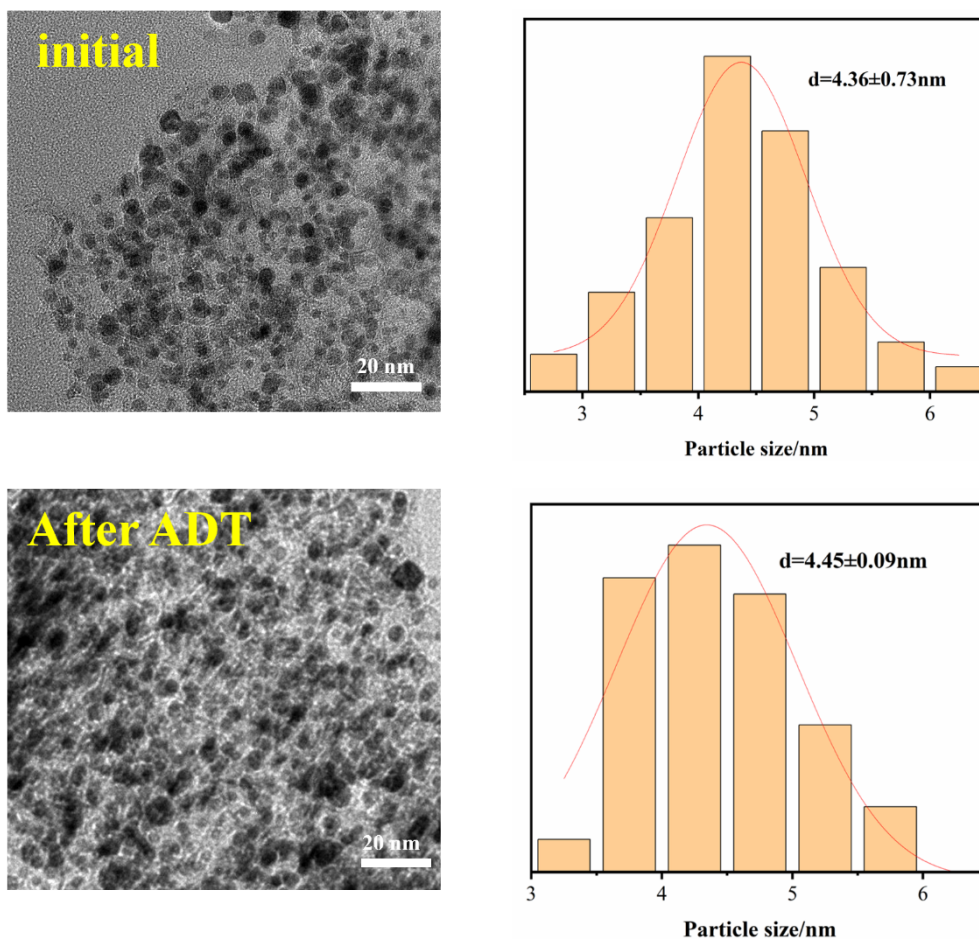

**Figure S21** TEM images and corresponding size distribution of commercial L1<sub>0</sub>-PtCo/HGNG before and after ADT.

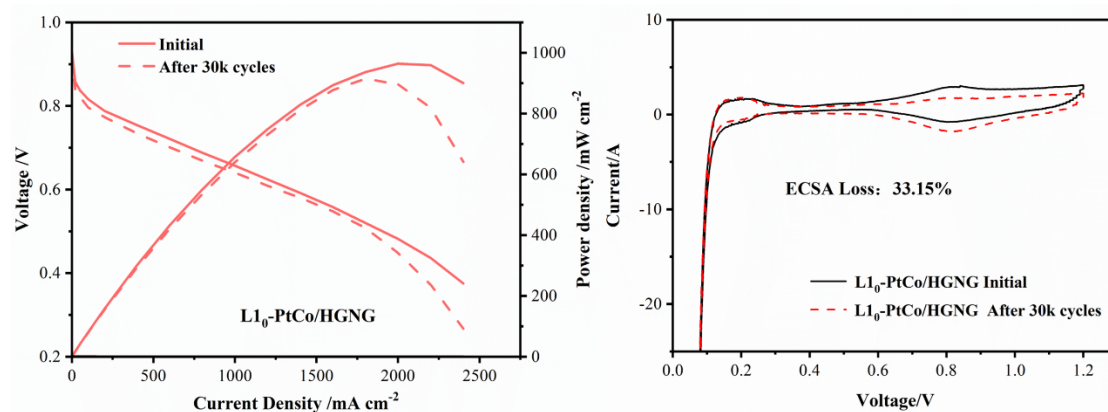

**Figure S22** The polarization curves of  $H_2$ -air fuel cell with  $L1_0$ -PtCo/HGNG and CV curves before and after 30k cycles ADT.

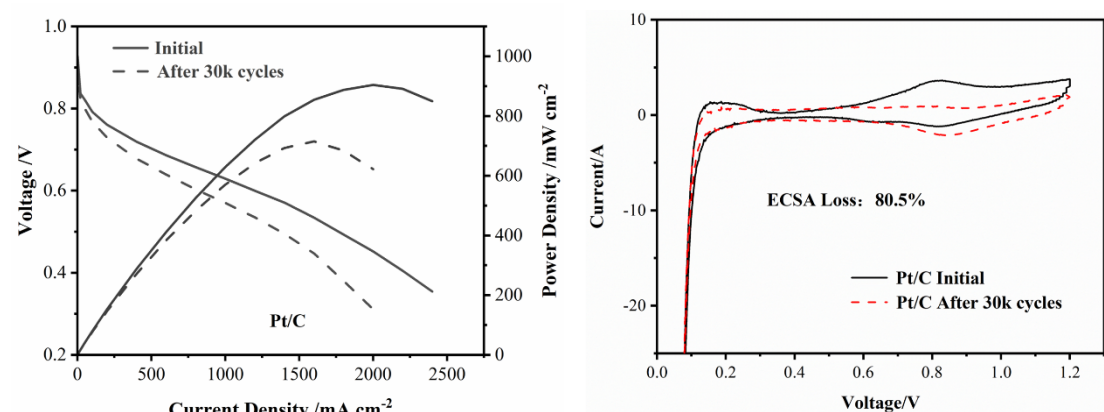

**Figure S23** The polarization curves of  $H_2$ -air fuel cell with Pt/C and CV curves before and after 30k cycles ADT.

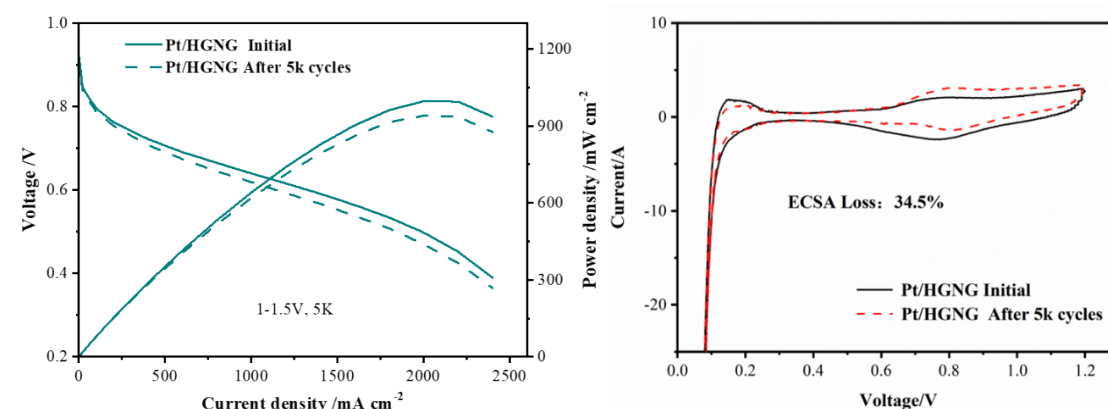

**Figure S24** The polarization curves of  $H_2$ -air fuel cell with Pt/HGNG and CV curves before and after 5k cycles ADT.

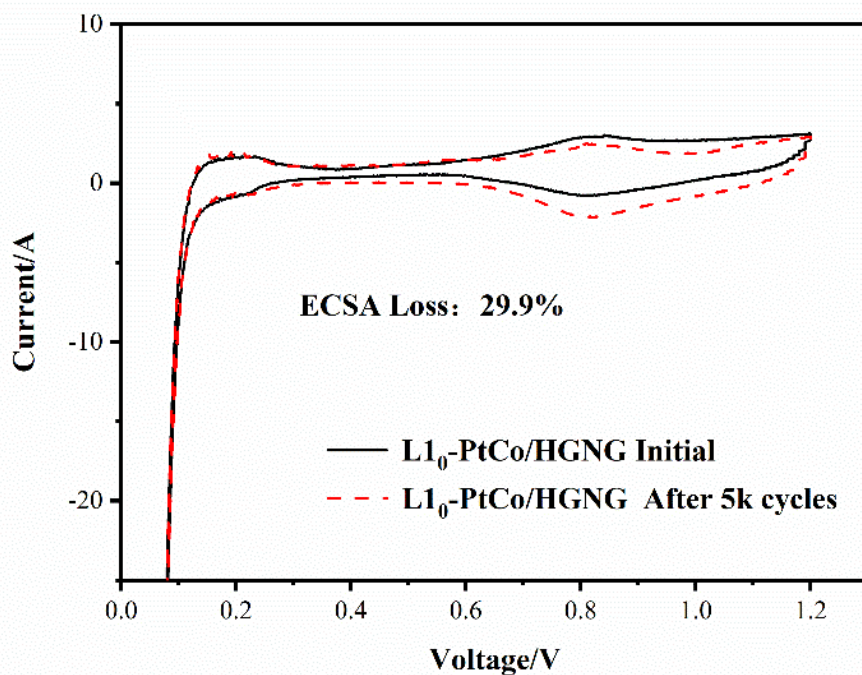

**Figure S25** CV curves of L1<sub>0</sub>-PtCo/HGNG before and after 5k cycles ADT.

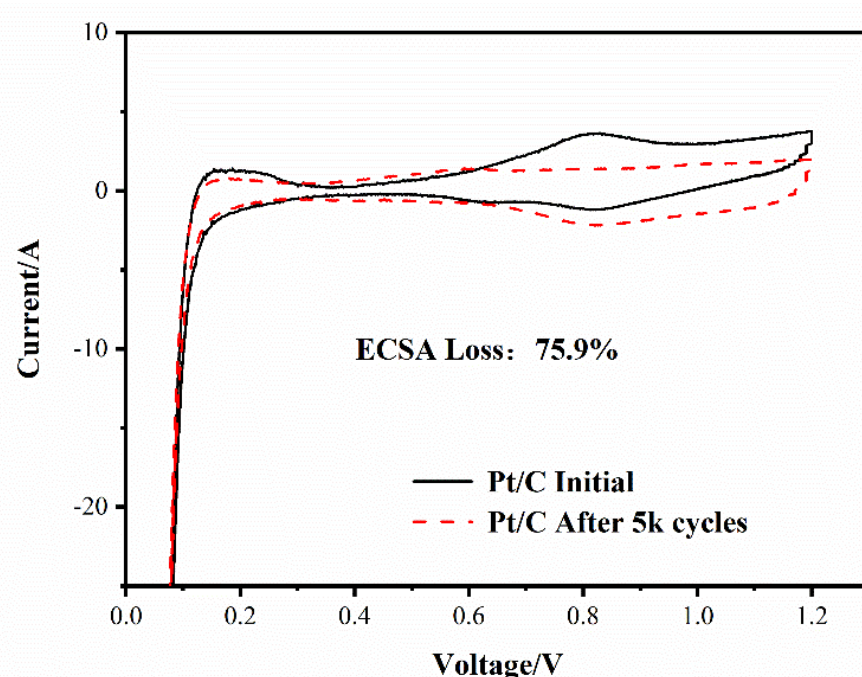

**Figure S26** CV curves of commercial Pt/C before and after 5k cycles ADT.

**Table S1** Contents of N, C, O element in HGG and HGNG obtained by XPS analysis.

|      | C     | N     | O     |
|------|-------|-------|-------|
|      | (at)  | (at)  | (at)  |
| HGG  | 97.9% | /     | 2.1%  |
| HGNG | 95.5% | 2.58% | 1.92% |

**Table S2** ICP results for Pt/HGNG and L1<sub>0</sub>-PtCo/HGNG.

| Catalysts                  | Pt    | Co     | Atom ratio |
|----------------------------|-------|--------|------------|
|                            | (wt)  | (wt)   | (Pt:Co)    |
| Pt/HGNG                    | 49.8% | /      | /          |
| L1 <sub>0</sub> -PtCo/HGNG | 45.9% | 10.05% | 58:42      |

**Table S3** Comparison of H<sub>2</sub>-Air fuel cell performance for recently reported Pt alloy electrocatalysts.

| Catalysts                                                       | Cathode loading<br>(mg <sub>Pt</sub> /cm <sup>2</sup> ) | Peak power density<br>(mW/cm <sup>2</sup> ) | Peak power density<br>(W/mg <sub>Pt</sub> ) | Pt loading<br>(wt) | References       |
|-----------------------------------------------------------------|---------------------------------------------------------|---------------------------------------------|---------------------------------------------|--------------------|------------------|
| <b>L1<sub>0</sub>-PtCo/HGNG</b>                                 | <b>0.1</b>                                              | <b>964</b>                                  | <b>9.64</b>                                 | <b>45.9%</b>       | <b>This work</b> |
| Commercial Pt/C                                                 | 0.1                                                     | 904                                         | 9.04                                        | 50%                | This work        |
| Pt1Co1-<br>IMC@Pt/C                                             | 0.1                                                     | 1130                                        | 11.3                                        | 44.7               | S1               |
| PCNMC-Co <sub>8</sub> Zn <sub>7</sub>                           | 0.1                                                     | 920                                         | 9.2                                         | 14.7%              | S2               |
| Pt <sub>3</sub> Co/FeN <sub>4</sub> -C                          | 0.1                                                     | 824                                         | 8.24                                        | 20%                | S3               |
| Pt/40Co-N-C-900                                                 | 0.13                                                    | 705                                         | 5.42                                        | 20%                | S4               |
| L1 <sub>2</sub> -Pt <sub>3</sub> Co@ML-<br>Pt/NPC <sub>10</sub> | 0.2                                                     | ~1020                                       | ~5.1                                        | 22%                | S5               |
| Coplanar Pt/C<br>NMs                                            | 0.1                                                     | 553                                         | 5.5                                         | 20%                | S6               |
| IM-Pt <sub>3</sub> Co                                           | 0.1                                                     | 820                                         | 8.2                                         | 13.37%             | S7               |
| PtCo/KB-NH <sub>2</sub>                                         | 0.1                                                     | 960                                         | 9.6                                         | 24%                | S8               |
| L1 <sub>0</sub> -PtZn/Pt/C                                      | 0.104                                                   | 750                                         | 7.2                                         | 20%                | S9               |



## References

- S1. Q. Cheng, S. Yang, C. Fu, L. Zou, Z. Zou, Z. Jiang, J. Zhang and H. Yang, *Energy Environ. Sci.*, 2022, **15**, 278-286.
- S2. Z. Chen, C. Hao, B. Yan, Q. Chen, H. Feng, X. Mao, J. Cen, Z. Tian, P. Tsiakaras and P. Shen, *Adv. Energy Mater.*, 2022, **12**, 2201600.
- S3. Z. Qiao, C. Wang, C. Li, Y. Zeng, S. Hwang, B. Li, S. Karakalos, J. Park, A. Kropf, E. Wegener, Q. Gong, H. Xu, G. Wang, D. Myers, J. Xie, J. Spendelow and Gang Wu, *Energy Environ. Sci.*, 2021, **14**, 4948-4960.
- S4. X. Wang, S. Hwang, Y. Pan, K. Chen, Y. He, S. Karakalos, H. Zhang, J. Spendelow, D. Su and G. Wu, *Nano Lett.*, 2018, **18**, 4163-4171.
- S5. Z. Wang, S. Chen, W. Wu, R. Chen, Y. Zhu, H. Jiang, L. Yu and N. Cheng, *Adv. Mater.*, 2023, **35**, 2301310.
- S6. Y. Hu, M. Zhu, X. Luo, G. Wu, T. Chao, Y. Qu, F. Zhou, R. Sun, X. Han, H. Li, B. Jiang, Y. Wu and X. Hong, *Angew. Chem. Int. Ed.*, 2021, **60**, 6533.
- S7. M. Zhu, H. Zhang, Y. Hu, F. Zhou, X. Gao, D. He, X. Zhao, C. Zhao, J. Wang, W. Tie, X. Tian, B. Wang, T. Yao, H. Zhou, Z. Wang, J. Wang, W. Guo and Y. Wu, *ACS Catal.*, 2024, **14**, 5858-5867.
- S8. Q. Gong, H. Zhang, H. Yu, S. Jeon, Y. Ren, Z. Yang, C. Sun, E. Stach, A. Fouche, Y. Yu, M. Smart, G. Filippelli, D. Cullen, P. Liu and J. Xie, *Matter*, 2023, **6**, 963-982.
- S9. J. Liang, Z. Zhao, N. Li, X. Wang, S. Li, X. Liu, T. Wang, G. Lu, D. Wang, B.-J. Hwang, Y. Huang, D. Su and Q. Li, *Adv. Energy Mater.*, 2020, **10**, 2000179.
